# Supplementary material for: Associations of pet ownership with biomarkers of ageing: population based cohort study
Source: PubMed Central journal article supplement — BMJ. 2017 Dec 13;359:j5558. doi: 10.1136/bmj.j5558 (PMC5728306; doi:10.1136/bmj.j5558), 2017-12-13
Supplement: batd036533.ww1.pdf [file batd036533.ww1.pdf]

## **Supplemental File: Batty et al. The Truth About Cats and Dogs: Associations of Pet Ownership with Biomarkers of Ageing in the English Longitudinal Study of Ageing**

### **Contents**

*Figures 1- 3:* Impact of separate adjustment for confounding and mediating variables on the association of pet ownership with biomarkers of ageing

*Figures 4 - 6:* Effect modification by gender in the association of pet ownership with biomarkers of ageing

*Figure 7:* Association of pet ownership with other later health indices

*Figures 8 - 11:* Impact of adjustment of baseline assessment of each ageing biomarker on the association of pet ownership with biomarkers of ageing

## Impact of separate adjustment for confounding and mediating variables on the association of pet ownership with biomarkers of ageing

### Supplemental Figure 1. Beta coefficients (part A) and relative risks (part B) for the relation of pet ownership with ageing biomarkers: physical functioning (N=8785)

#### Part A.

|                           | Model 1                 |         | Model 1 + confounders  |         | Model 1 + mediators    |         | All covariates         |         |  |
|---------------------------|-------------------------|---------|------------------------|---------|------------------------|---------|------------------------|---------|--|
| Gait speed (m/sec)        | $\beta$ (95% CI)        | P-value | $\beta$ (95% CI)       | P-value | $\beta$ (95% CI)       | P-value | $\beta$ (95% CI)       | P-value |  |
| No pet                    | 0 (ref.)                |         | 0 (ref.)               |         | 0 (ref.)               |         | 0 (ref.)               |         |  |
| Dog                       | -0.03 (-0.05 to -0.02)  | < 0.001 | -0.02 (-0.04 to -0.01) | 0.004   | -0.03 (-0.05 to -0.02) | < 0.001 | -0.02 (-0.04 to -0.01) | 0.003   |  |
| Cat (no dog)              | 0.004 (-0.02 to 0.02)   | 0.71    | -0.001 (-0.02 to 0.02) | 0.91    | -0.001 (-0.02 to 0.02) | 0.90    | 0 (-0.02 to 0.01)      | 0.75    |  |
| Other pet                 | -0.04 (-0.08 to -0.002) | 0.04    | -0.02 (-0.06 to 0.01)  | 0.21    | -0.03 (-0.07 to 0.01)  | 0.11    | -0.02 (-0.06 to 0.02)  | 0.26    |  |
| <b>FEV1 (L/sec)</b>       |                         |         |                        |         |                        |         |                        |         |  |
| No pet                    | 0 (ref.)                |         | 0 (ref.)               |         | 0 (ref.)               |         | 0 (ref.)               |         |  |
| Dog                       | -0.004 (-0.04 to 0.04)  | 0.87    | 0.04 (0.01 to 0.08)    | 0.02    | 0.01 (-0.03 to 0.05)   | 0.55    | 0.04 (0.01 to 0.08)    | 0.02    |  |
| Cat (no dog)              | 0.01 (-0.03 to 0.05)    | 0.65    | 0.01 (-0.03 to 0.05)   | 0.61    | 0.01 (-0.04 to 0.05)   | 0.82    | 0.01 (-0.03 to 0.05)   | 0.64    |  |
| Other pet                 | -0.06 (-0.14 to 0.03)   | 0.18    | -0.02 (-0.10 to 0.06)  | 0.70    | -0.03 (-0.11 to 0.05)  | 0.43    | -0.01 (-0.09 to 0.07)  | 0.73    |  |
| <b>Chair rise (secs)</b>  |                         |         |                        |         |                        |         |                        |         |  |
| No pet                    | 0 (ref.)                |         | 0 (ref.)               |         | 0 (ref.)               |         | 0 (ref.)               |         |  |
| Dog                       | 0.58 (0.26 to 0.90)     | < 0.001 | 0.27 (-0.03 to 0.57)   | 0.08    | 0.42 (0.11 to 0.72)    | 0.01    | 0.27 (-0.03 to 0.56)   | 0.07    |  |
| Cat (no dog)              | 0.25 (-0.13 to 0.63)    | 0.19    | 0.30 (-0.06 to 0.66)   | 0.10    | 0.30 (-0.07 to 0.67)   | 0.11    | 0.3 (-0.06 to 0.66)    | 0.10    |  |
| Other pet                 | 0.75 (0.10 to 1.39)     | 0.02    | 0.35 (-0.25 to 0.96)   | 0.25    | 0.48 (-0.14 to 1.09)   | 0.13    | 0.32 (-0.28 to 0.92)   | 0.30    |  |
| <b>Grip strength (kg)</b> |                         |         |                        |         |                        |         |                        |         |  |
| No pet                    | 0 (ref.)                |         | 0 (ref.)               |         | 0 (ref.)               |         | 0 (ref.)               |         |  |
| Dog                       | 0.04 (-0.40 to 0.48)    | 0.87    | 0.36 (-0.07 to 0.79)   | 0.10    | 0.18 (-0.24 to 0.61)   | 0.39    | 0.33 (-0.09 to 0.75)   | 0.12    |  |
| Cat (no dog)              | 0.43 (-0.14 to 0.99)    | 0.14    | 0.33 (-0.22 to 0.88)   | 0.24    | 0.37 (-0.18 to 0.91)   | 0.19    | 0.29 (-0.25 to 0.83)   | 0.28    |  |
| Other pet                 | -1.08 (-2.00 to -0.16)  | 0.02    | -0.59 (-1.48 to 0.30)  | 0.19    | -0.94 (-1.84 to -0.05) | 0.04    | -0.67 (-1.55 to 0.22)  | 0.14    |  |

#### Part B.

|                        | Model 1             |         | Model 1 + confounders |         | Model 1 + mediators |         | All covariates      |         |  |
|------------------------|---------------------|---------|-----------------------|---------|---------------------|---------|---------------------|---------|--|
| Leg raise failure      | RR (95% CI)         | P-value | RR (95% CI)           | P-value | RR (95% CI)         | P-value | RR (95% CI)         | P-value |  |
| No pet                 | 1 (ref.)            |         | 1 (ref.)              |         | 1 (ref.)            |         | 1 (ref.)            |         |  |
| Dog                    | 1.05 (0.97 to 1.13) | 0.19    | 1.02 (0.94 to 1.09)   | 0.67    | 1.02 (0.95 to 1.10) | 0.55    | 1 (0.93 to 1.08)    | 0.94    |  |
| Cat (no dog)           | 1.08 (1.00 to 1.16) | 0.06    | 1.08 (1.00 to 1.17)   | 0.04    | 1.09 (1.01 to 1.17) | 0.03    | 1.09 (1.01 to 1.17) | 0.03    |  |
| Other pet              | 1.04 (0.90 to 1.21) | 0.57    | 0.99 (0.86 to 1.14)   | 0.88    | 1.01 (0.87 to 1.16) | 0.94    | 0.98 (0.85 to 1.13) | 0.79    |  |
| <b>Balance failure</b> |                     |         |                       |         |                     |         |                     |         |  |
| No pet                 | 1 (ref.)            |         | 1 (ref.)              |         | 1 (ref.)            |         | 1 (ref.)            |         |  |
| Dog                    | 1.07 (0.96 to 1.19) | 0.25    | 0.99 (0.88 to 1.10)   | 0.83    | 1.03 (0.92 to 1.15) | 0.59    | 0.98 (0.88 to 1.10) | 0.77    |  |
| Cat (no dog)           | 1.01 (0.88 to 1.15) | 0.90    | 1.01 (0.89 to 1.16)   | 0.84    | 1.03 (0.90 to 1.17) | 0.66    | 1.03 (0.90 to 1.17) | 0.67    |  |
| Other pet              | 1.39 (1.11 to 1.75) | 0.004   | 1.25 (1.00 to 1.58)   | 0.05    | 1.3 (1.04 to 1.63)  | 0.02    | 1.24 (0.99 to 1.55) | 0.06    |  |

Model 1: age and sex; Confounders: wealth, self-reported health, smoking status, and alcohol consumption; Mediators: social isolation, loneliness, physical activity, and body mass index; All covariates: all above covariates

**Supplemental Figure 2. Beta coefficients (95% confidence interval) for the relation of pet ownership with ageing biomarkers: immune functioning (N=8785)**

|                                               | Model 1               |         | Model 1 + confounders  |         | Model 1 + mediators   |         | All covariates         |         |  |
|-----------------------------------------------|-----------------------|---------|------------------------|---------|-----------------------|---------|------------------------|---------|--|
| C-reactive protein (log(mg/L))                | $\beta$ (95% CI)      | P-value | $\beta$ (95% CI)       | P-value | $\beta$ (95% CI)      | P-value | $\beta$ (95% CI)       | P-value |  |
| No pet                                        | 0 (ref.)              |         | 0 (ref.)               |         | 0 (ref.)              |         | 0 (ref.)               |         |  |
| Dog                                           | 0.09 (-0.003 to 0.18) | 0.06    | 0.03 (-0.06 to 0.12)   | 0.47    | 0.04 (-0.04 to 0.13)  | 0.31    | 0.01 (-0.08 to 0.10)   | 0.82    |  |
| Cat (no dog)                                  | 0.02 (-0.07 to 0.11)  | 0.61    | 0.03 (-0.06 to 0.12)   | 0.52    | 0.03 (-0.05 to 0.11)  | 0.46    | 0.02 (-0.06 to 0.11)   | 0.56    |  |
| Other pet                                     | 0.11 (-0.08 to 0.29)  | 0.26    | 0.04 (-0.14 to 0.22)   | 0.66    | 0.04 (-0.14 to 0.21)  | 0.68    | 0.01 (-0.16 to 0.19)   | 0.87    |  |
| <b>WBC (log[x10<sup>9</sup> cells/litre])</b> |                       |         |                        |         |                       |         |                        |         |  |
| No pet                                        | 0 (ref.)              |         | 0 (ref.)               |         | 0 (ref.)              |         | 0 (ref.)               |         |  |
| Dog                                           | 0.02 (0.001 to 0.04)  | 0.04    | 0.003 (-0.02 to 0.02)  | 0.75    | 0.01 (-0.01 to 0.03)  | 0.15    | 0.0001 (-0.02 to 0.02) | 0.99    |  |
| Cat (no dog)                                  | 0.02 (-0.01 to 0.04)  | 0.26    | 0.01 (-0.01 to 0.04)   | 0.34    | 0.02 (-0.01 to 0.04)  | 0.20    | 0.01 (-0.01 to 0.04)   | 0.33    |  |
| Other pet                                     | 0.05 (-0.004 to 0.10) | 0.07    | 0.04 (-0.01 to 0.09)   | 0.15    | 0.04 (-0.02 to 0.09)  | 0.16    | 0.03 (-0.02 to 0.09)   | 0.19    |  |
| <b>Fibrinogen (log[g/L])</b>                  |                       |         |                        |         |                       |         |                        |         |  |
| No pet                                        | 0 (ref.)              |         | 0 (ref.)               |         | 0 (ref.)              |         | 0 (ref.)               |         |  |
| Dog                                           | 0.01 (-0.01 to 0.02)  | 0.48    | -0.001 (-0.02 to 0.02) | 0.90    | 0.001 (-0.02 to 0.02) | 0.86    | -0.003 (-0.02 to 0.01) | 0.67    |  |
| Cat (no dog)                                  | 0.01 (-0.01 to 0.02)  | 0.22    | 0.01 (-0.005 to 0.02)  | 0.20    | 0.01 (-0.003 to 0.02) | 0.15    | 0.01 (-0.004 to 0.02)  | 0.20    |  |
| Other pet                                     | 0.02 (-0.002 to 0.05) | 0.07    | 0.02 (-0.01 to 0.04)   | 0.17    | 0.02 (-0.01 to 0.04)  | 0.23    | 0.01 (-0.01 to 0.04)   | 0.26    |  |

Model 1: age and sex; Confounders: wealth, self-reported health, smoking status, and alcohol consumption; Mediators: social isolation, loneliness, physical activity, and body mass index; All covariates: all above covariates

**Supplemental Figure 3. Beta coefficients (part A) and relative risks (part B) for the relation of pet ownership with biomarkers of ageing: psychological functioning (N=8785)**

**Part A.**

|              | Model 1                |         | Model 1 + confounders |         | Model 1 + mediators    |         | All covariates        |         |
|--------------|------------------------|---------|-----------------------|---------|------------------------|---------|-----------------------|---------|
| Memory       | $\beta$ (95% CI)       | P-value | $\beta$ (95% CI)      | P-value | $\beta$ (95% CI)       | P-value | $\beta$ (95% CI)      | P-value |
| No pet       | 0 (ref.)               |         | 0 (ref.)              |         | 0 (ref.)               |         | 0 (ref.)              |         |
| Dog          | -0.31 (-0.52 to -0.09) | 0.01    | -0.15 (-0.37 to 0.06) | 0.16    | -0.23 (-0.45 to -0.02) | 0.03    | -0.16 (-0.37 to 0.06) | 0.15    |
| Cat (no dog) | 0.10 (-0.15 to 0.35)   | 0.43    | 0.05 (-0.18 to 0.29)  | 0.66    | 0.08 (-0.16 to 0.32)   | 0.53    | 0.05 (-0.19 to 0.28)  | 0.69    |
| Other pet    | -0.28 (-0.70 to 0.14)  | 0.19    | -0.05 (-0.46 to 0.35) | 0.79    | -0.18 (-0.59 to 0.23)  | 0.39    | -0.06 (-0.46 to 0.34) | 0.78    |

**Part B.**

|                     | Model 1             |         | Model 1 + confounders |         | Model 1 + mediators |         | All covariates      |         |
|---------------------|---------------------|---------|-----------------------|---------|---------------------|---------|---------------------|---------|
| Depressive symptoms | RR (95% CI)         | P-value | RR (95% CI)           | P-value | RR (95% CI)         | P-value | RR (95% CI)         | P-value |
| No pet              | 1 (ref.)            |         | 1 (ref.)              | 0       | 1 (ref.)            | 0       | 1 (ref.)            |         |
| Dog                 | 1.28 (1.14 to 1.44) | < 0.001 | 1.13 (1.01 to 1.27)   | 0.03    | 1.16 (1.04 to 1.30) | 0.01    | 1.09 (0.98 to 1.22) | 0.13    |
| Cat (no dog)        | 1.05 (0.90 to 1.22) | 0.54    | 1.06 (0.92 to 1.22)   | 0.43    | 1.05 (0.91 to 1.21) | 0.47    | 1.05 (0.92 to 1.21) | 0.47    |
| Other pet           | 1.24 (0.95 to 1.60) | 0.11    | 1.08 (0.84 to 1.39)   | 0.56    | 1.14 (0.91 to 1.44) | 0.26    | 1.09 (0.87 to 1.37) | 0.45    |

Model 1: age and sex; Confounders: wealth, self-reported health, smoking status, and alcohol consumption; Mediators: social isolation, loneliness, physical activity, and body mass index; All covariates: all above covariates

*Effect modification by gender in the association of pet ownership with biomarkers of ageing*

**Supplemental Figure 4. Beta coefficients (part A) and relative risks (part B) for the relation of pet ownership with ageing biomarkers: physical functioning according to gender (3922 men, 4863 women)**

**Part A.**

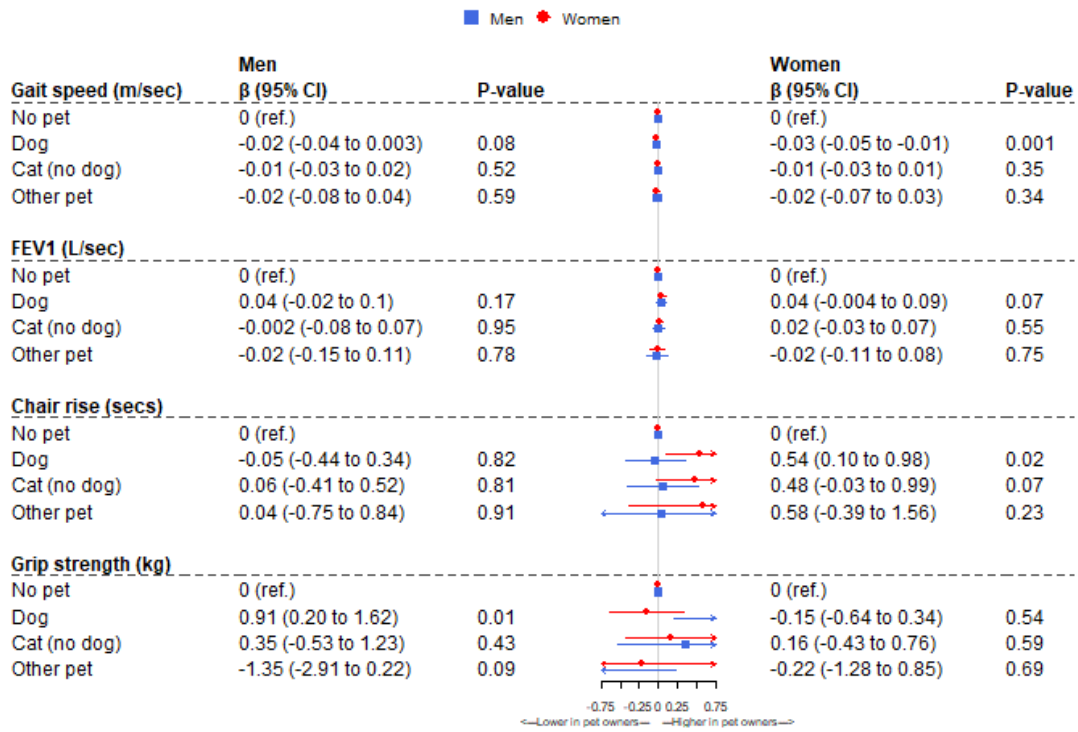

FEV1, Forced Expiratory Volume in one second

**Part B.**

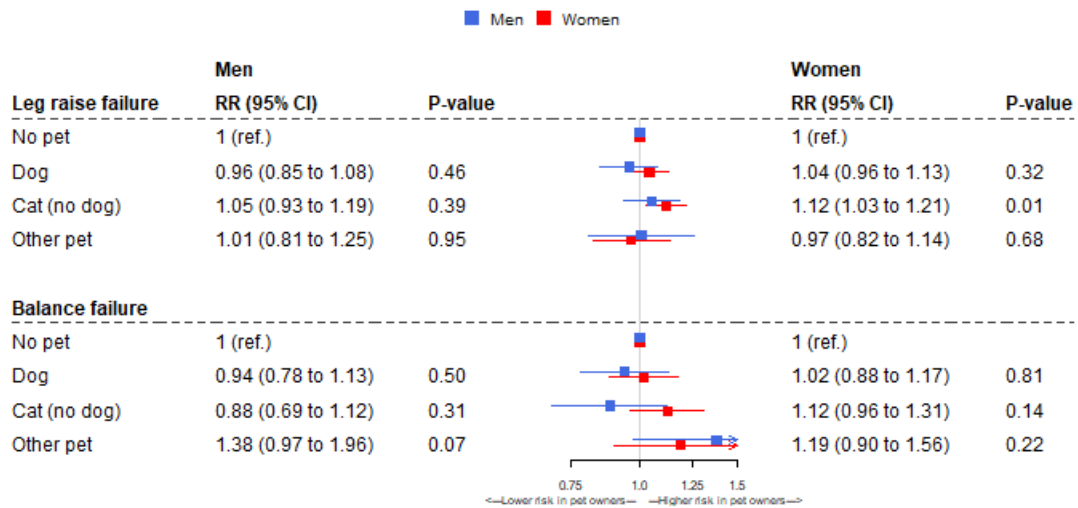

Effect estimates are adjusted for all covariates (as in Supplemental Figure 3)

**Supplemental Figure 5. Beta coefficients (95% confidence interval) for the relation of pet ownership with ageing biomarkers: immune functioning according to gender (3922 men, 4863 women)**

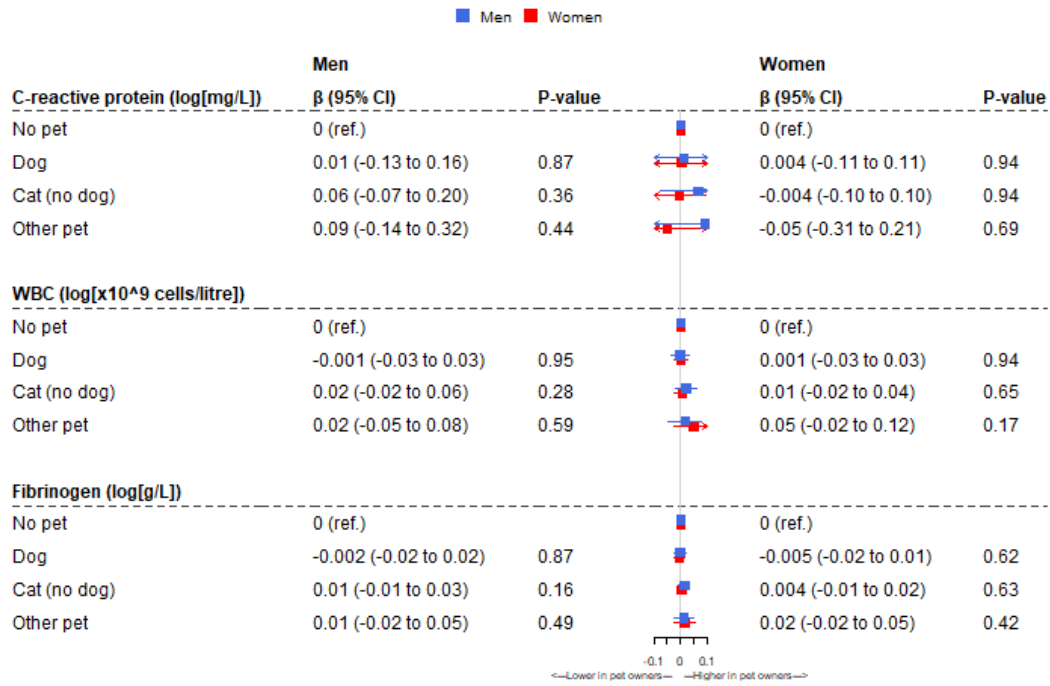

Effect estimates are adjusted for all covariates (as in Supplemental Figure 3). WBC, white blood cell count

**Supplemental Figure 6. Beta coefficients (part A) and relative risks (part B) for the relation of pet ownership with biomarkers of ageing: psychological functioning according to gender (3922 men, 4863 women)**

**Part A.**

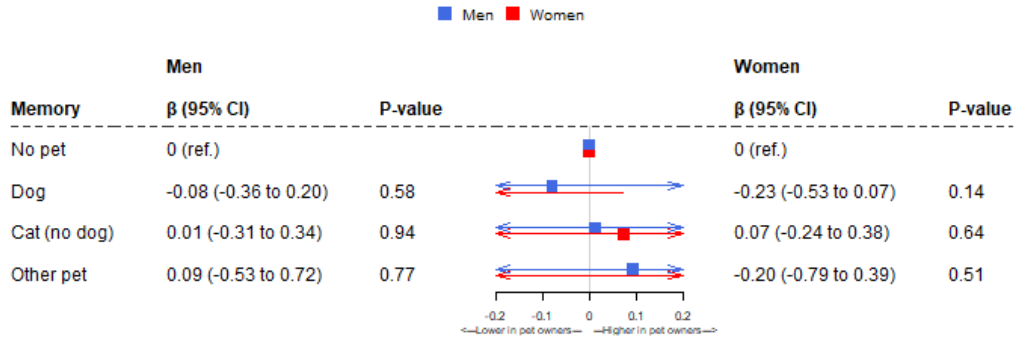

**Part B.**

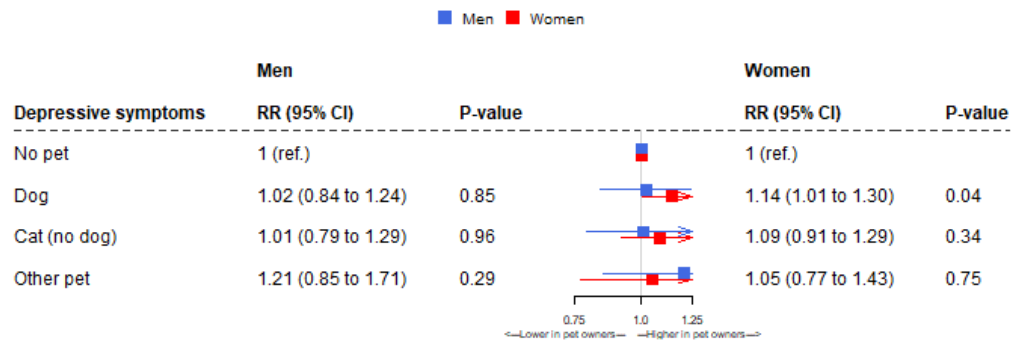

Effect estimates are adjusted for all covariates (as in Supplemental Figure 3)

## Association of pet ownership with other later health indices

### Supplemental Figure 7. Beta coefficients (part A) and relative risks (part B) for the relation of pet ownership with later risk indices (N=8785)

#### Part A.

|                                   | Model 1                |         | Model 1 + confounders  |         | Model 1 + mediators   |         | All covariates          |  | P-value |
|-----------------------------------|------------------------|---------|------------------------|---------|-----------------------|---------|-------------------------|--|---------|
| Systolic blood pressure (mmHg)    | $\beta$ (95% CI)       | P-value | $\beta$ (95% CI)       | P-value | $\beta$ (95% CI)      | P-value | $\beta$ (95% CI)        |  |         |
| No pet                            | 0 (ref.)               |         | 0 (ref.)               |         | 0 (ref.)              |         | 0 (ref.)                |  |         |
| Dog                               | 0.84 (-0.35 to 2.02)   | 0.17    | 0.90 (-0.28 to 2.08)   | 0.13    | 0.67 (-0.5 to 1.84)   | 0.26    | 0.73 (-0.44 to 1.89)    |  | 0.22    |
| Cat (no dog)                      | 0.04 (-1.32 to 1.4)    | 0.96    | 0.14 (-1.22 to 1.50)   | 0.84    | 0 (-1.36 to 1.36)     | > 0.999 | 0.06 (-1.29 to 1.41)    |  | 0.93    |
| Other pet                         | -1.32 (-4 to 1.36)     | 0.33    | -1.52 (-4.20 to 1.16)  | 0.26    | -1.53 (-4.21 to 1.14) | 0.26    | -1.65 (-4.33 to 1.03)   |  | 0.22    |
| <b>BMI (kg/m<sup>2</sup>)</b>     |                        |         |                        |         |                       |         |                         |  |         |
| No pet                            | 0 (ref.)               |         | 0 (ref.)               |         | 0 (ref.)              |         | 0 (ref.)                |  |         |
| Dog                               | 0.46 (0.13 to 0.79)    | 0.01    | 0.39 (0.07 to 0.71)    | 0.02    | 0.07 (-0.14 to 0.28)  | 0.50    | 0.07 (-0.14 to 0.28)    |  | 0.48    |
| Cat (no dog)                      | 0.06 (-0.33 to 0.45)   | 0.75    | 0.19 (-0.20 to 0.57)   | 0.34    | 0.11 (-0.11 to 0.34)  | 0.32    | 0.12 (-0.10 to 0.35)    |  | 0.28    |
| Other pet                         | 0.60 (-0.11 to 1.31)   | 0.10    | 0.28 (-0.41 to 0.97)   | 0.43    | -0.02 (-0.49 to 0.46) | 0.94    | -0.03 (-0.51 to 0.44)   |  | 0.88    |
| <b>Waist circumference (cm)</b>   |                        |         |                        |         |                       |         |                         |  |         |
| No pet                            | 0 (ref.)               |         | 0 (ref.)               |         | 0 (ref.)              |         | 0 (ref.)                |  |         |
| Dog                               | 1.57 (0.81 to 2.32)    | < 0.001 | 1.21 (0.48 to 1.93)    | 1E-3    | 0.60 (0.13 to 1.07)   | 0.01    | 0.46 (-0.01 to 0.94)    |  | 0.06    |
| Cat (no dog)                      | 0.76 (-0.26 to 1.78)   | 0.14    | 1.01 (0.01 to 2.01)    | 0.05    | 0.91 (0.30 to 1.51)   | 0.004   | 0.87 (0.27 to 1.47)     |  | 0.01    |
| Other pet                         | 1.38 (-0.37 to 3.12)   | 0.12    | 0.52 (-1.19 to 2.23)   | 0.55    | -0.13 (-1.51 to 1.25) | 0.85    | -0.19 (-1.59 to 1.2)    |  | 0.78    |
| <b>Total cholesterol (mmol/L)</b> |                        |         |                        |         |                       |         |                         |  |         |
| No pet                            | 0 (ref.)               |         | 0 (ref.)               |         | 0 (ref.)              |         | 0 (ref.)                |  |         |
| Dog                               | 0.05 (-0.03 to 0.13)   | 0.19    | 0.08 (0.004 to 0.16)   | 0.04    | 0.07 (-0.01 to 0.15)  | 0.07    | 0.09 (0.01 to 0.16)     |  | 0.03    |
| Cat (no dog)                      | 0.05 (-0.04 to 0.14)   | 0.27    | 0.04 (-0.05 to 0.12)   | 0.39    | 0.05 (-0.04 to 0.13)  | 0.29    | 0.04 (-0.05 to 0.13)    |  | 0.36    |
| Other pet                         | -0.02 (-0.18 to 0.15)  | 0.83    | 0.02 (-0.14 to 0.18)   | 0.78    | 0.01 (-0.16 to 0.18)  | 0.91    | 0.03 (-0.14 to 0.19)    |  | 0.74    |
| <b>HDL cholesterol (mmol/L)</b>   |                        |         |                        |         |                       |         |                         |  |         |
| No pet                            | 0 (ref.)               |         | 0 (ref.)               |         | 0 (ref.)              |         | 0 (ref.)                |  |         |
| Dog                               | -0.03 (-0.06 to -0.01) | 0.02    | -0.02 (-0.04 to 0.01)  | 0.21    | -0.02 (-0.04 to 0.01) | 0.26    | -0.01 (-0.03 to 0.02)   |  | 0.60    |
| Cat (no dog)                      | 0.004 (-0.03 to 0.04)  | 0.83    | -0.003 (-0.04 to 0.03) | 0.85    | 0.002 (-0.03 to 0.04) | 0.91    | -0.0009 (-0.03 to 0.03) |  | 0.96    |
| Other pet                         | -0.02 (-0.09 to 0.05)  | 0.61    | 0.002 (-0.07 to 0.07)  | 0.95    | 0.01 (-0.07 to 0.08)  | 0.87    | 0.01 (-0.06 to 0.08)    |  | 0.77    |
| <b>LDL cholesterol (mmol/L)</b>   |                        |         |                        |         |                       |         |                         |  |         |
| No pet                            | 0 (ref.)               |         | 0 (ref.)               |         | 0 (ref.)              |         | 0 (ref.)                |  |         |
| Dog                               | 0.05 (-0.03 to 0.12)   | 0.22    | 0.07 (-0.004 to 0.15)  | 0.06    | 0.06 (-0.02 to 0.14)  | 0.12    | 0.07 (0 to 0.15)        |  | 0.06    |
| Cat (no dog)                      | 0.03 (-0.05 to 0.11)   | 0.43    | 0.02 (-0.05 to 0.10)   | 0.54    | 0.03 (-0.05 to 0.10)  | 0.48    | 0.02 (-0.05 to 0.1)     |  | 0.53    |
| Other pet                         | -0.04 (-0.19 to 0.10)  | 0.57    | -0.01 (-0.15 to 0.14)  | 0.94    | -0.02 (-0.17 to 0.12) | 0.75    | -0.01 (-0.15 to 0.14)   |  | 0.95    |
| <b>Triglycerides (mmol/L)</b>     |                        |         |                        |         |                       |         |                         |  |         |
| No pet                            | 0 (ref.)               |         | 0 (ref.)               |         | 0 (ref.)              |         | 0 (ref.)                |  |         |
| Dog                               | 0.05 (0.01 to 0.09)    | 0.01    | 0.03 (-0.004 to 0.07)  | 0.08    | 0.03 (-0.005 to 0.07) | 0.08    | 0.02 (-0.01 to 0.06)    |  | 0.21    |
| Cat (no dog)                      | 0.02 (-0.02 to 0.06)   | 0.30    | 0.02 (-0.01 to 0.06)   | 0.20    | 0.02 (-0.01 to 0.06)  | 0.21    | 0.02 (-0.01 to 0.06)    |  | 0.21    |
| Other pet                         | 0.07 (-0.01 to 0.16)   | 0.09    | 0.05 (-0.04 to 0.14)   | 0.24    | 0.05 (-0.03 to 0.14)  | 0.22    | 0.04 (-0.04 to 0.13)    |  | 0.30    |
| <b>HbA1c (log[mmol/mol])</b>      |                        |         |                        |         |                       |         |                         |  |         |
| No pet                            | 0 (ref.)               |         | 0 (ref.)               |         | 0 (ref.)              |         | 0 (ref.)                |  |         |
| Dog                               | 0.02 (0.005 to 0.03)   | 0.01    | 0.01 (0 to 0.02)       | 0.09    | 0.01 (0.0007 to 0.02) | 0.04    | 0.01 (-0.004 to 0.02)   |  | 0.17    |
| Cat (no dog)                      | 0.02 (0.001 to 0.03)   | 0.04    | 0.02 (0 to 0.03)       | 0.02    | 0.02 (0.003 to 0.03)  | 0.02    | 0.02 (0.003 to 0.03)    |  | 0.02    |
| Other pet                         | 0.02 (-0.01 to 0.04)   | 0.17    | 0.01 (-0.01 to 0.03)   | 0.44    | 0.01 (-0.02 to 0.03)  | 0.49    | 0.01 (-0.02 to 0.03)    |  | 0.60    |

#### Part B.

|                 | Model 1             |         | Model 1 + confounders |         | Model 1 + mediators |         | All covariates      |  | P-value |
|-----------------|---------------------|---------|-----------------------|---------|---------------------|---------|---------------------|--|---------|
| Type 2 diabetes | RR (95% CI)         | P-value | RR (95% CI)           | P-value | RR (95% CI)         | P-value | RR (95% CI)         |  |         |
| No pet          | 1 (ref.)            |         | 1 (ref.)              |         | 1 (ref.)            |         | 1 (ref.)            |  |         |
| Dog             | 0.95 (0.81 to 1.11) | 0.52    | 0.87 (0.74 to 1.02)   | 0.08    | 0.89 (0.76 to 1.04) | 0.13    | 0.84 (0.72 to 0.98) |  | 0.02    |
| Cat (no dog)    | 1.13 (0.94 to 1.34) | 0.19    | 1.17 (0.98 to 1.39)   | 0.07    | 1.16 (0.98 to 1.37) | 0.09    | 1.18 (1.00 to 1.39) |  | 0.05    |
| Other pet       | 1.07 (0.76 to 1.52) | 0.70    | 0.96 (0.68 to 1.35)   | 0.81    | 0.95 (0.67 to 1.34) | 0.76    | 0.91 (0.64 to 1.28) |  | 0.58    |

Model 1: age and sex; Confounders: wealth, self-reported health, smoking status, and alcohol consumption; Mediators: social isolation, loneliness, physical activity, and body mass index; All covariates: all above covariates. BMI, body mass index; HDL, High-density lipoprotein; LDL, Low-density lipoprotein; HbA1c, Glycated haemoglobin



*Impact of adjustment of baseline assessment of each ageing biomarker on the association of pet ownership with biomarkers of ageing*

**Supplemental Figure 8. Beta coefficients (part A) and relative risks (part B) for the relation of pet ownership with ageing biomarkers: physical functioning (N=8785)**

**Part A.**

|                           | Model 1<br>β (95% CI)   | P-value | Model 1 + confounders<br>β (95% CI) | P-value | Model 1 + mediators<br>β (95% CI) | P-value | All covariates<br>β (95% CI) | P-value |
|---------------------------|-------------------------|---------|-------------------------------------|---------|-----------------------------------|---------|------------------------------|---------|
| <b>Gait speed (m/sec)</b> |                         |         |                                     |         |                                   |         |                              |         |
| No pet                    | 0 (ref.)                |         | 0 (ref.)                            |         | 0 (ref.)                          |         | 0 (ref.)                     |         |
| Dog                       | -0.03 (-0.05 to -0.02)  | < 0.001 | -0.02 (-0.04 to -0.01)              | 0.004   | -0.03 (-0.05 to -0.02)            | < 0.001 | -0.02 (-0.04 to -0.01)       | 0.003   |
| Cat (no dog)              | 0.004 (-0.02 to 0.02)   | 0.71    | -0.001 (-0.02 to 0.02)              | 0.91    | -0.001 (-0.02 to 0.02)            | 0.90    | 0 (-0.02 to 0.01)            | 0.75    |
| Other pet                 | -0.04 (-0.08 to -0.002) | 0.04    | -0.02 (-0.06 to 0.01)               | 0.21    | -0.03 (-0.07 to 0.01)             | 0.11    | -0.02 (-0.06 to 0.02)        | 0.26    |
| <b>FEV1 (L/sec)</b>       |                         |         |                                     |         |                                   |         |                              |         |
| No pet                    | 0 (ref.)                |         | 0 (ref.)                            |         | 0 (ref.)                          |         | 0 (ref.)                     |         |
| Dog                       | -0.004 (-0.04 to 0.04)  | 0.87    | 0.04 (0.01 to 0.08)                 | 0.02    | 0.01 (-0.03 to 0.05)              | 0.55    | 0.04 (0.01 to 0.08)          | 0.02    |
| Cat (no dog)              | 0.01 (-0.03 to 0.05)    | 0.65    | 0.01 (-0.03 to 0.05)                | 0.61    | 0.01 (-0.04 to 0.05)              | 0.82    | 0.01 (-0.03 to 0.05)         | 0.64    |
| Other pet                 | -0.06 (-0.14 to 0.03)   | 0.18    | -0.02 (-0.10 to 0.06)               | 0.70    | -0.03 (-0.11 to 0.05)             | 0.43    | -0.01 (-0.09 to 0.07)        | 0.73    |
| <b>Chair rise (secs)</b>  |                         |         |                                     |         |                                   |         |                              |         |
| No pet                    | 0 (ref.)                |         | 0 (ref.)                            |         | 0 (ref.)                          |         | 0 (ref.)                     |         |
| Dog                       | 0.58 (0.26 to 0.90)     | < 0.001 | 0.27 (-0.03 to 0.57)                | 0.08    | 0.42 (0.11 to 0.72)               | 0.01    | 0.27 (-0.03 to 0.56)         | 0.07    |
| Cat (no dog)              | 0.25 (-0.13 to 0.63)    | 0.19    | 0.30 (-0.06 to 0.66)                | 0.10    | 0.30 (-0.07 to 0.67)              | 0.11    | 0.3 (-0.06 to 0.66)          | 0.10    |
| Other pet                 | 0.75 (0.10 to 1.39)     | 0.02    | 0.35 (-0.25 to 0.96)                | 0.25    | 0.48 (-0.14 to 1.09)              | 0.13    | 0.32 (-0.28 to 0.92)         | 0.30    |
| <b>Grip strength (kg)</b> |                         |         |                                     |         |                                   |         |                              |         |
| No pet                    | 0 (ref.)                |         | 0 (ref.)                            |         | 0 (ref.)                          |         | 0 (ref.)                     |         |
| Dog                       | 0.04 (-0.40 to 0.48)    | 0.87    | 0.36 (-0.07 to 0.79)                | 0.10    | 0.18 (-0.24 to 0.61)              | 0.39    | 0.33 (-0.09 to 0.75)         | 0.12    |
| Cat (no dog)              | 0.43 (-0.14 to 0.99)    | 0.14    | 0.33 (-0.22 to 0.88)                | 0.24    | 0.37 (-0.18 to 0.91)              | 0.19    | 0.29 (-0.25 to 0.83)         | 0.28    |
| Other pet                 | -1.08 (-2.00 to -0.16)  | 0.02    | -0.59 (-1.48 to 0.30)               | 0.19    | -0.94 (-1.84 to -0.05)            | 0.04    | -0.67 (-1.55 to 0.22)        | 0.14    |

FEV1, Forced Expiratory Volume in one second

**Part B.**

|                          | Model 1<br>RR (95% CI) | P-value | Model 1 + confounders<br>RR (95% CI) | P-value | Model 1 + mediators<br>RR (95% CI) | P-value | All covariates<br>RR (95% CI) | P-value |
|--------------------------|------------------------|---------|--------------------------------------|---------|------------------------------------|---------|-------------------------------|---------|
| <b>Leg raise failure</b> |                        |         |                                      |         |                                    |         |                               |         |
| No pet                   | 1 (ref.)               |         | 1 (ref.)                             |         | 1 (ref.)                           |         | 1 (ref.)                      |         |
| Dog                      | 1.05 (0.97 to 1.13)    | 0.19    | 1.02 (0.94 to 1.09)                  | 0.67    | 1.02 (0.95 to 1.10)                | 0.55    | 1 (0.93 to 1.08)              | 0.94    |
| Cat (no dog)             | 1.08 (1.00 to 1.16)    | 0.06    | 1.08 (1.00 to 1.17)                  | 0.04    | 1.09 (1.01 to 1.17)                | 0.03    | 1.09 (1.01 to 1.17)           | 0.03    |
| Other pet                | 1.04 (0.90 to 1.21)    | 0.57    | 0.99 (0.86 to 1.14)                  | 0.88    | 1.01 (0.87 to 1.16)                | 0.94    | 0.98 (0.85 to 1.13)           | 0.79    |
| <b>Balance failure</b>   |                        |         |                                      |         |                                    |         |                               |         |
| No pet                   | 1 (ref.)               |         | 1 (ref.)                             |         | 1 (ref.)                           |         | 1 (ref.)                      |         |
| Dog                      | 1.07 (0.96 to 1.19)    | 0.25    | 0.99 (0.88 to 1.10)                  | 0.83    | 1.03 (0.92 to 1.15)                | 0.59    | 0.98 (0.88 to 1.10)           | 0.77    |
| Cat (no dog)             | 1.01 (0.88 to 1.15)    | 0.90    | 1.01 (0.89 to 1.16)                  | 0.84    | 1.03 (0.90 to 1.17)                | 0.66    | 1.03 (0.90 to 1.17)           | 0.67    |
| Other pet                | 1.39 (1.11 to 1.75)    | 0.004   | 1.25 (1.00 to 1.58)                  | 0.05    | 1.3 (1.04 to 1.63)                 | 0.02    | 1.24 (0.99 to 1.55)           | 0.06    |

Model 1: age, sex, and baseline (wave 4) assessment of biomarker outcome; Confounders: wealth, self-reported health, smoking status, and alcohol consumption; Mediators: social isolation, loneliness, physical activity, and body mass index; All covariates: all above covariates.

**Supplemental Figure 9. Beta coefficients (95% confidence interval) for the relation of pet ownership with ageing biomarkers: immune functioning (N=8785)**

| C-reactive protein (log[mg/L])                | Model 1               |         | Model 1 + confounders  |         | Model 1 + mediators   |         | All covariates         |  | P-value |
|-----------------------------------------------|-----------------------|---------|------------------------|---------|-----------------------|---------|------------------------|--|---------|
|                                               | $\beta$ (95% CI)      | P-value | $\beta$ (95% CI)       | P-value | $\beta$ (95% CI)      | P-value | $\beta$ (95% CI)       |  |         |
| No pet                                        | 0 (ref.)              |         | 0 (ref.)               |         | 0 (ref.)              |         | 0 (ref.)               |  |         |
| Dog                                           | 0.09 (-0.003 to 0.18) | 0.06    | 0.03 (-0.06 to 0.12)   | 0.47    | 0.04 (-0.04 to 0.13)  | 0.31    | 0.01 (-0.08 to 0.10)   |  | 0.82    |
| Cat (no dog)                                  | 0.02 (-0.07 to 0.11)  | 0.61    | 0.03 (-0.06 to 0.12)   | 0.52    | 0.03 (-0.05 to 0.11)  | 0.46    | 0.02 (-0.06 to 0.11)   |  | 0.56    |
| Other pet                                     | 0.11 (-0.08 to 0.29)  | 0.26    | 0.04 (-0.14 to 0.22)   | 0.66    | 0.04 (-0.14 to 0.21)  | 0.68    | 0.01 (-0.16 to 0.19)   |  | 0.87    |
| <b>WBC (log[x10<sup>9</sup> cells/litre])</b> |                       |         |                        |         |                       |         |                        |  |         |
| No pet                                        | 0 (ref.)              |         | 0 (ref.)               |         | 0 (ref.)              |         | 0 (ref.)               |  |         |
| Dog                                           | 0.02 (0.001 to 0.04)  | 0.04    | 0.003 (-0.02 to 0.02)  | 0.75    | 0.01 (-0.01 to 0.03)  | 0.15    | 0.0001 (-0.02 to 0.02) |  | 0.99    |
| Cat (no dog)                                  | 0.02 (-0.01 to 0.04)  | 0.26    | 0.01 (-0.01 to 0.04)   | 0.34    | 0.02 (-0.01 to 0.04)  | 0.20    | 0.01 (-0.01 to 0.04)   |  | 0.33    |
| Other pet                                     | 0.05 (-0.004 to 0.10) | 0.07    | 0.04 (-0.01 to 0.09)   | 0.15    | 0.04 (-0.02 to 0.09)  | 0.16    | 0.03 (-0.02 to 0.09)   |  | 0.19    |
| <b>Fibrinogen (log[g/L])</b>                  |                       |         |                        |         |                       |         |                        |  |         |
| No pet                                        | 0 (ref.)              |         | 0 (ref.)               |         | 0 (ref.)              |         | 0 (ref.)               |  |         |
| Dog                                           | 0.01 (-0.01 to 0.02)  | 0.48    | -0.001 (-0.02 to 0.02) | 0.90    | 0.001 (-0.02 to 0.02) | 0.86    | -0.003 (-0.02 to 0.01) |  | 0.67    |
| Cat (no dog)                                  | 0.01 (-0.01 to 0.02)  | 0.22    | 0.01 (-0.005 to 0.02)  | 0.20    | 0.01 (-0.003 to 0.02) | 0.15    | 0.01 (-0.004 to 0.02)  |  | 0.20    |
| Other pet                                     | 0.02 (-0.002 to 0.05) | 0.07    | 0.02 (-0.01 to 0.04)   | 0.17    | 0.02 (-0.01 to 0.04)  | 0.23    | 0.01 (-0.01 to 0.04)   |  | 0.26    |

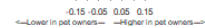

Model 1: age, sex, and baseline (wave 4) assessment of biomarker outcome; Confounders: wealth, self-reported health, smoking status, and alcohol consumption; Mediators: social isolation, loneliness, physical activity, and body mass index; All covariates: all above covariates.

**Supplemental Figure 10. Beta coefficients (part A) and relative risks (part B) for the relation of pet ownership with biomarkers of ageing: psychological functioning (N=8785)**

**Part A.**

| Memory       | Model 1                |         | Model 1 + confounders |         | Model 1 + mediators    |         | All covariates        |                                                                                     | P-value |
|--------------|------------------------|---------|-----------------------|---------|------------------------|---------|-----------------------|-------------------------------------------------------------------------------------|---------|
|              | $\beta$ (95% CI)       | P-value | $\beta$ (95% CI)      | P-value | $\beta$ (95% CI)       | P-value | $\beta$ (95% CI)      |                                                                                     |         |
| No pet       | 0 (ref.)               |         | 0 (ref.)              |         | 0 (ref.)               |         | 0 (ref.)              |                                                                                     |         |
| Dog          | -0.31 (-0.52 to -0.09) | 0.01    | -0.15 (-0.37 to 0.06) | 0.16    | -0.23 (-0.45 to -0.02) | 0.03    | -0.16 (-0.37 to 0.06) |  | 0.15    |
| Cat (no dog) | 0.10 (-0.15 to 0.35)   | 0.43    | 0.05 (-0.18 to 0.29)  | 0.66    | 0.08 (-0.16 to 0.32)   | 0.53    | 0.05 (-0.19 to 0.28)  |  | 0.69    |
| Other pet    | -0.28 (-0.70 to 0.14)  | 0.19    | -0.05 (-0.46 to 0.35) | 0.79    | -0.18 (-0.59 to 0.23)  | 0.39    | -0.06 (-0.46 to 0.34) |  | 0.78    |

-0.15 -0.05 0.05 0.15  
←Lower in pet owners→ →Higher in pet owners→

**Part B.**

| Depressive symptoms | Model 1             |         | Model 1 + confounders |         | Model 1 + mediators |         | All covariates      |                                                                                     | P-value |
|---------------------|---------------------|---------|-----------------------|---------|---------------------|---------|---------------------|-------------------------------------------------------------------------------------|---------|
|                     | RR (95% CI)         | P-value | RR (95% CI)           | P-value | RR (95% CI)         | P-value | RR (95% CI)         |                                                                                     |         |
| No pet              | 1 (ref.)            |         | 1 (ref.)              | 0       | 1 (ref.)            | 0       | 1 (ref.)            |                                                                                     |         |
| Dog                 | 1.28 (1.14 to 1.44) | < 0.001 | 1.13 (1.01 to 1.27)   | 0.03    | 1.16 (1.04 to 1.30) | 0.01    | 1.09 (0.98 to 1.22) |  | 0.13    |
| Cat (no dog)        | 1.05 (0.90 to 1.22) | 0.54    | 1.06 (0.92 to 1.22)   | 0.43    | 1.05 (0.91 to 1.21) | 0.47    | 1.05 (0.92 to 1.21) |  | 0.47    |
| Other pet           | 1.24 (0.95 to 1.60) | 0.11    | 1.08 (0.84 to 1.39)   | 0.56    | 1.14 (0.91 to 1.44) | 0.26    | 1.09 (0.87 to 1.37) |  | 0.45    |

0.75 1.25  
←Lower in pet owners→ →Higher in pet owners→

Model 1: age, sex, and baseline (wave 4) assessment of biomarker outcome; Confounders: wealth, self-reported health, smoking status, and alcohol consumption; Mediators: social isolation, loneliness, physical activity, and body mass index; All covariates: all above covariates.

## Supplemental Figure 11. Beta coefficients (part A) and relative risks (part B) for the relation of pet ownership with later risk indices (N=8785)

### Part A.

|                                       | Model 1                |         | Model 1 + confounders  |         | Model 1 + mediators   |         | All covariates          |         |  |
|---------------------------------------|------------------------|---------|------------------------|---------|-----------------------|---------|-------------------------|---------|--|
|                                       | $\beta$ (95% CI)       | P-value | $\beta$ (95% CI)       | P-value | $\beta$ (95% CI)      | P-value | $\beta$ (95% CI)        | P-value |  |
| <b>Systolic blood pressure (mmHg)</b> |                        |         |                        |         |                       |         |                         |         |  |
| No pet                                | 0 (ref.)               |         | 0 (ref.)               |         | 0 (ref.)              |         | 0 (ref.)                |         |  |
| Dog                                   | 0.84 (-0.35 to 2.02)   | 0.17    | 0.90 (-0.28 to 2.08)   | 0.13    | 0.67 (-0.5 to 1.84)   | 0.26    | 0.73 (-0.44 to 1.89)    | 0.22    |  |
| Cat (no dog)                          | 0.04 (-1.32 to 1.4)    | 0.96    | 0.14 (-1.22 to 1.50)   | 0.84    | 0 (-1.36 to 1.36)     | > 0.999 | 0.06 (-1.29 to 1.41)    | 0.93    |  |
| Other pet                             | -1.32 (-4 to 1.36)     | 0.33    | -1.52 (-4.20 to 1.16)  | 0.26    | -1.53 (-4.21 to 1.14) | 0.26    | -1.65 (-4.33 to 1.03)   | 0.22    |  |
| <b>BMI (kg/m<sup>2</sup>)</b>         |                        |         |                        |         |                       |         |                         |         |  |
| No pet                                | 0 (ref.)               |         | 0 (ref.)               |         | 0 (ref.)              |         | 0 (ref.)                |         |  |
| Dog                                   | 0.46 (0.13 to 0.79)    | 0.01    | 0.39 (0.07 to 0.71)    | 0.02    | 0.07 (-0.14 to 0.28)  | 0.50    | 0.07 (-0.14 to 0.28)    | 0.48    |  |
| Cat (no dog)                          | 0.06 (-0.33 to 0.45)   | 0.75    | 0.19 (-0.20 to 0.57)   | 0.34    | 0.11 (-0.11 to 0.34)  | 0.32    | 0.12 (-0.10 to 0.35)    | 0.28    |  |
| Other pet                             | 0.60 (-0.11 to 1.31)   | 0.10    | 0.28 (-0.41 to 0.97)   | 0.43    | -0.02 (-0.49 to 0.46) | 0.94    | -0.03 (-0.51 to 0.44)   | 0.88    |  |
| <b>Waist circumference (cm)</b>       |                        |         |                        |         |                       |         |                         |         |  |
| No pet                                | 0 (ref.)               |         | 0 (ref.)               |         | 0 (ref.)              |         | 0 (ref.)                |         |  |
| Dog                                   | 1.57 (0.81 to 2.32)    | < 0.001 | 1.21 (0.48 to 1.93)    | 1E-3    | 0.60 (0.13 to 1.07)   | 0.01    | 0.46 (-0.01 to 0.94)    | 0.06    |  |
| Cat (no dog)                          | 0.76 (-0.26 to 1.78)   | 0.14    | 1.01 (0.01 to 2.01)    | 0.05    | 0.91 (0.30 to 1.51)   | 0.004   | 0.87 (0.27 to 1.47)     | -0.01   |  |
| Other pet                             | 1.38 (-0.37 to 3.12)   | 0.12    | 0.52 (-1.19 to 2.23)   | 0.55    | -0.13 (-1.51 to 1.25) | 0.85    | -0.19 (-1.59 to 1.2)    | 0.78    |  |
| <b>Total cholesterol (mmol/L)</b>     |                        |         |                        |         |                       |         |                         |         |  |
| No pet                                | 0 (ref.)               |         | 0 (ref.)               |         | 0 (ref.)              |         | 0 (ref.)                |         |  |
| Dog                                   | 0.05 (-0.03 to 0.13)   | 0.19    | 0.08 (0.004 to 0.16)   | 0.04    | 0.07 (-0.01 to 0.15)  | 0.07    | 0.09 (0.01 to 0.16)     | 0.03    |  |
| Cat (no dog)                          | 0.05 (-0.04 to 0.14)   | 0.27    | 0.04 (-0.05 to 0.12)   | 0.39    | 0.05 (-0.04 to 0.13)  | 0.29    | 0.04 (-0.05 to 0.13)    | 0.36    |  |
| Other pet                             | -0.02 (-0.18 to 0.15)  | 0.83    | 0.02 (-0.14 to 0.18)   | 0.78    | 0.01 (-0.16 to 0.18)  | 0.91    | 0.03 (-0.14 to 0.19)    | 0.74    |  |
| <b>HDL cholesterol (mmol/L)</b>       |                        |         |                        |         |                       |         |                         |         |  |
| No pet                                | 0 (ref.)               |         | 0 (ref.)               |         | 0 (ref.)              |         | 0 (ref.)                |         |  |
| Dog                                   | -0.03 (-0.06 to -0.01) | 0.02    | -0.02 (-0.04 to 0.01)  | 0.21    | -0.02 (-0.04 to 0.01) | 0.26    | -0.01 (-0.03 to 0.02)   | 0.60    |  |
| Cat (no dog)                          | 0.004 (-0.03 to 0.04)  | 0.83    | -0.003 (-0.04 to 0.03) | 0.85    | 0.002 (-0.03 to 0.04) | 0.91    | -0.0009 (-0.03 to 0.03) | 0.96    |  |
| Other pet                             | -0.02 (-0.09 to 0.05)  | 0.61    | 0.002 (-0.07 to 0.07)  | 0.95    | 0.01 (-0.07 to 0.08)  | 0.87    | 0.01 (-0.06 to 0.08)    | 0.77    |  |
| <b>LDL cholesterol (mmol/L)</b>       |                        |         |                        |         |                       |         |                         |         |  |
| No pet                                | 0 (ref.)               |         | 0 (ref.)               |         | 0 (ref.)              |         | 0 (ref.)                |         |  |
| Dog                                   | 0.05 (-0.03 to 0.12)   | 0.22    | 0.07 (-0.004 to 0.15)  | 0.06    | 0.06 (-0.02 to 0.14)  | 0.12    | 0.07 (0 to 0.15)        | 0.06    |  |
| Cat (no dog)                          | 0.03 (-0.05 to 0.11)   | 0.43    | 0.02 (-0.05 to 0.10)   | 0.54    | 0.03 (-0.05 to 0.10)  | 0.48    | 0.02 (-0.05 to 0.1)     | 0.53    |  |
| Other pet                             | -0.04 (-0.19 to 0.10)  | 0.57    | -0.01 (-0.15 to 0.14)  | 0.94    | -0.02 (-0.17 to 0.12) | 0.75    | -0.01 (-0.15 to 0.14)   | 0.95    |  |
| <b>Triglycerides (mmol/L)</b>         |                        |         |                        |         |                       |         |                         |         |  |
| No pet                                | 0 (ref.)               |         | 0 (ref.)               |         | 0 (ref.)              |         | 0 (ref.)                |         |  |
| Dog                                   | 0.05 (0.01 to 0.09)    | 0.01    | 0.03 (-0.004 to 0.07)  | 0.08    | 0.03 (-0.005 to 0.07) | 0.08    | 0.02 (-0.01 to 0.06)    | 0.21    |  |
| Cat (no dog)                          | 0.02 (-0.02 to 0.06)   | 0.30    | 0.02 (-0.01 to 0.06)   | 0.20    | 0.02 (-0.01 to 0.06)  | 0.21    | 0.02 (-0.01 to 0.06)    | 0.21    |  |
| Other pet                             | 0.07 (-0.01 to 0.16)   | 0.09    | 0.05 (-0.04 to 0.14)   | 0.24    | 0.05 (-0.03 to 0.14)  | 0.22    | 0.04 (-0.04 to 0.13)    | 0.30    |  |
| <b>HbA1c (log(mmol/mol))</b>          |                        |         |                        |         |                       |         |                         |         |  |
| No pet                                | 0 (ref.)               |         | 0 (ref.)               |         | 0 (ref.)              |         | 0 (ref.)                |         |  |
| Dog                                   | 0.02 (0.005 to 0.03)   | 0.01    | 0.01 (0 to 0.02)       | 0.09    | 0.01 (0.0007 to 0.02) | 0.04    | 0.01 (-0.004 to 0.02)   | 0.17    |  |
| Cat (no dog)                          | 0.02 (0.001 to 0.03)   | 0.04    | 0.02 (0 to 0.03)       | 0.02    | 0.02 (0.003 to 0.03)  | 0.02    | 0.02 (0.003 to 0.03)    | 0.02    |  |
| Other pet                             | 0.02 (-0.01 to 0.04)   | 0.17    | 0.01 (-0.01 to 0.03)   | 0.44    | 0.01 (-0.02 to 0.03)  | 0.49    | 0.01 (-0.02 to 0.03)    | 0.60    |  |

### Part B.

|                 | Model 1             |         | Model 1 + confounders |         | Model 1 + mediators |         | All covariates      |         |  |
|-----------------|---------------------|---------|-----------------------|---------|---------------------|---------|---------------------|---------|--|
| Type 2 diabetes | RR (95% CI)         | P-value | RR (95% CI)           | P-value | RR (95% CI)         | P-value | RR (95% CI)         | P-value |  |
| No pet          | 1 (ref.)            |         | 1 (ref.)              |         | 1 (ref.)            |         | 1 (ref.)            |         |  |
| Dog             | 0.95 (0.81 to 1.11) | 0.52    | 0.87 (0.74 to 1.02)   | 0.08    | 0.89 (0.76 to 1.04) | 0.13    | 0.84 (0.72 to 0.98) | 0.02    |  |
| Cat (no dog)    | 1.13 (0.94 to 1.34) | 0.19    | 1.17 (0.98 to 1.39)   | 0.07    | 1.16 (0.98 to 1.37) | 0.09    | 1.18 (1.00 to 1.39) | 0.05    |  |
| Other pet       | 1.07 (0.76 to 1.52) | 0.70    | 0.96 (0.68 to 1.35)   | 0.81    | 0.95 (0.67 to 1.34) | 0.76    | 0.91 (0.64 to 1.28) | 0.58    |  |

Model 1: age, sex, and baseline (wave 4) assessment of biomarker outcome; Confounders: wealth, self-reported health, smoking status, and alcohol consumption; Mediators: social isolation, loneliness, physical activity, and body mass index; All covariates: all above covariates. BMI, body mass index; HDL, High-density lipoprotein; LDL, Low-density lipoprotein; HbA1c, Glycated haemoglobin
